# Supplementary material for: Integrating error-prone PCR and DNA shuffling as an effective molecular evolution strategy for the production of α-ketoglutaric acid byl-amino acid deaminase
Source: Royal Society of Chemistry journal article supplement (doi:10.1039/c6ra02940j), 2016-01-01
Supplement: c6ra02940j1.pdf [file c6ra02940j1.pdf]

1 **Supplemental figure captions:**

2 **Supplemental Figure S1.** Expression of pm133, pm1338 and pm1338gs4 in the engineered *B. subtilis* (BSUC1).

3 **Supplemental Figure S2.** Influence of pH and temperature on the production rate by the whole cell biocatalyst containing  
4 pm133 (gray color bar), pm1338 (blue color bar) and pm1338gs4 (red color bar). **A.** influence of pH on the production rate; **B.**  
5 influence of temperature on the production rate. Data were analyzed using the Student's t test. *P* values less than 0.05 were  
6 considered statistically significant

7 **Supplemental Figure S3.** Influence of site-directed mutagenesis of the four amino acids (278, 317, 415 and 418) in the  
8 pm133gs4 which are close to the active sites. **A.** Effect of site-directed mutagenesis of the amino acid at position 278 on the  
9 activity. **B.** Effect of site-directed mutagenesis of the amino acid at position 317 on the activity. **C.** Effect of site-directed  
10 mutagenesis of the amino acid at position 415 on the activity. **D.** Effect of site-directed mutagenesis of the amino acid at  
11 position 418 on the activity.

12

13

14

15

16

17

18

19

20

21

22

23

24

25

26

27

28

29

30

31

32  
33  
34  
35  
36  
37  
38  
39  
40  
41  
42  
43  
44  
45  
46  
47  
48  
49  
50  
51  
52  
53  
54  
55

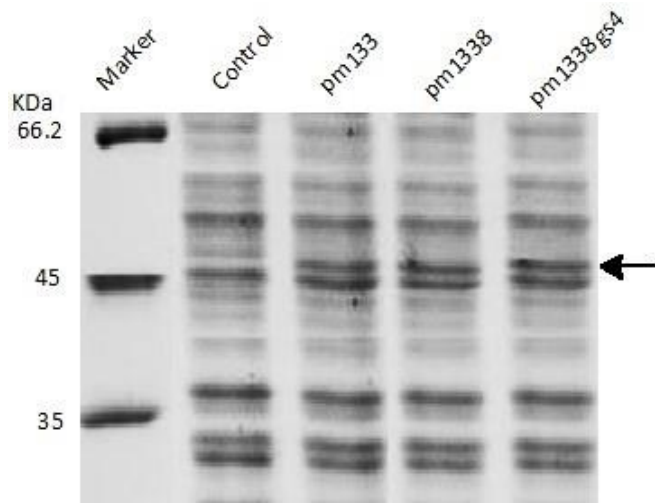

Supplemental Figure S1

56

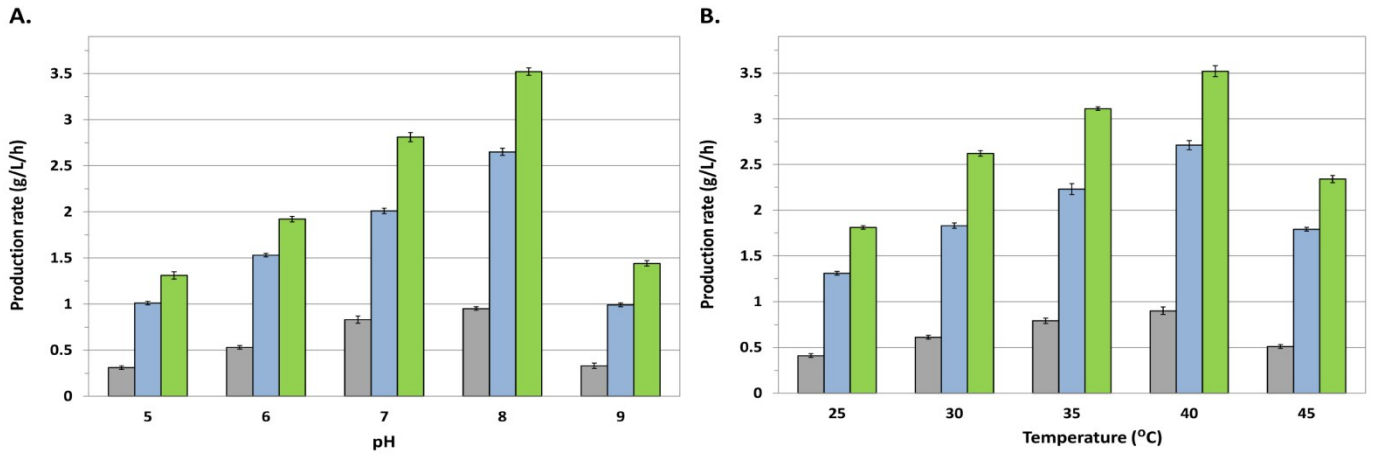

57

58

Supplemental Figure S2

59

60

61

62

63

64

65

66

67

68

69

70

71

72

73

74

75

76

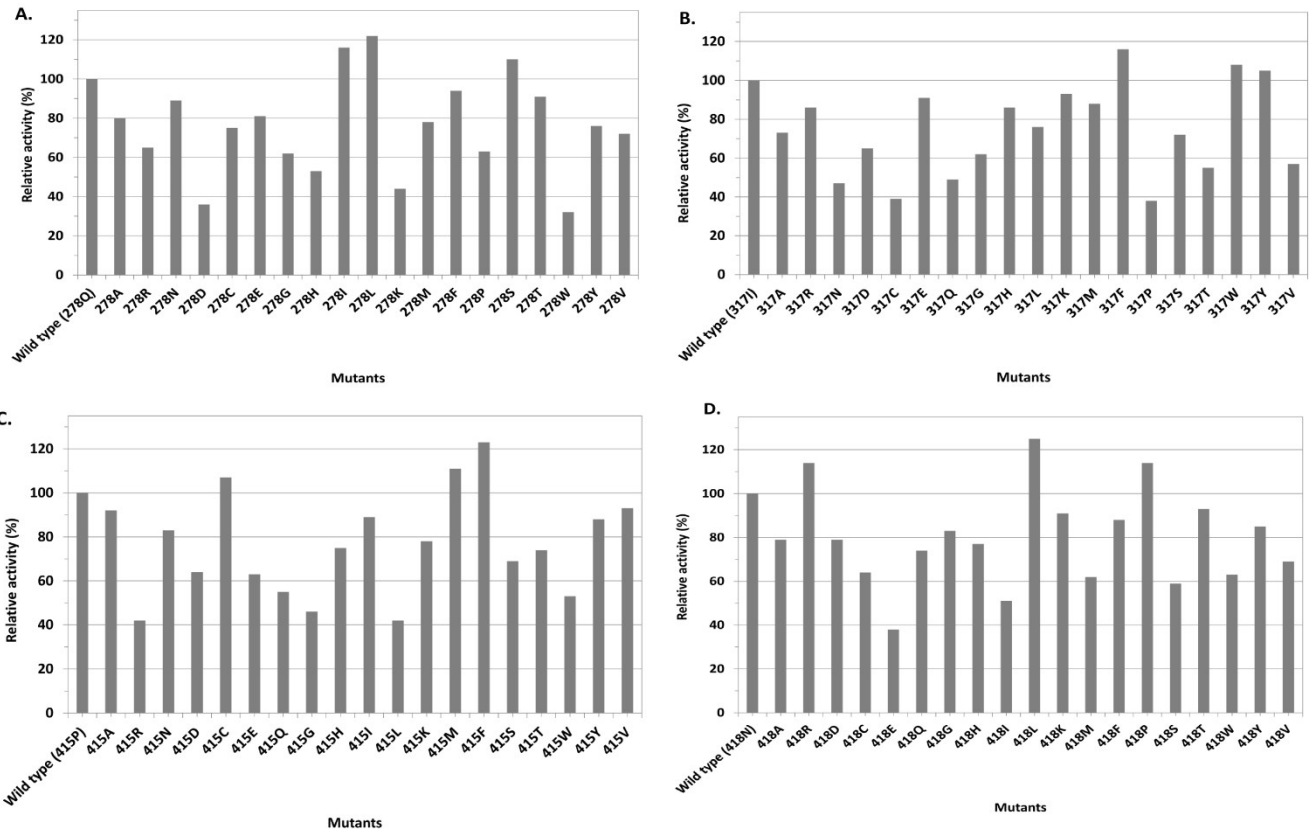

Supplemental Figure S3
